# Supplementary material
Source: HighWire-hosted journal article supplement (https://erj.ersjournals.com/content/51/1/1700991)
Supplement: inline-supplementary-material-1 [file inline-supplementary-material-1.pdf]

## Phenotypes of organ involvement in sarcoidosis

### SUPPLEMENT

**Figure S1. Modified MCA including Belgrade as variable**

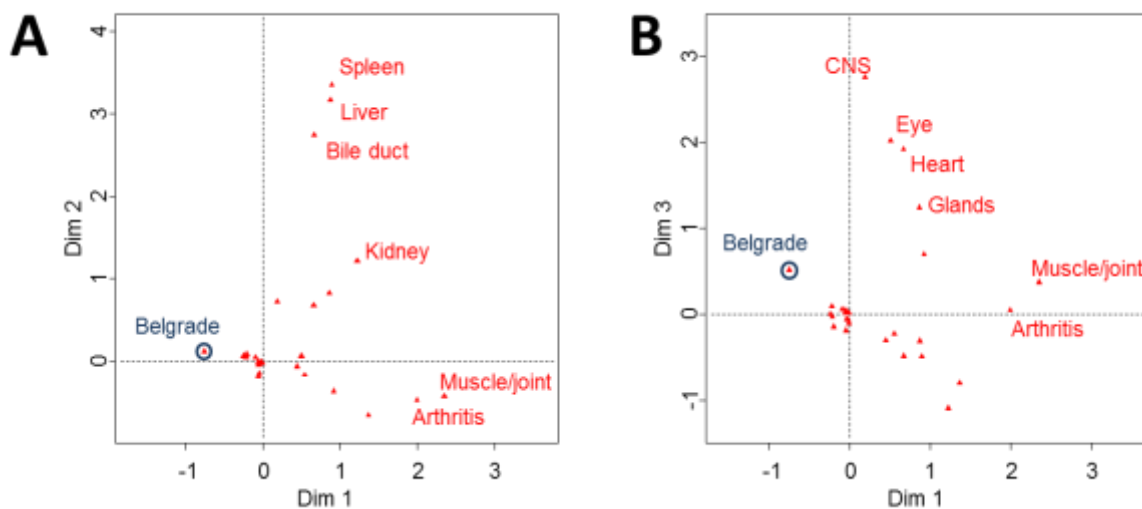

**Figure S1:** Factor maps of a modified MCA of organ involvement with inclusion of all original variables of organ involvement (as in figure 2) and additionally the recruiting centre “Belgrade” vs. the remaining study centres as variable. We calculated this modified MCA to evaluate a potential bias of the largest recruiting center. Dichotomization of the variable “Belgrade” vs. all other centers was necessary to achieve binary data as input for the modified MCA. A and B are scatter plots of variables contributing to different dimensions (MCA factor maps). Labelling of variables close to the zero-point was omitted due to narrowness. Factor loading of Belgrade on dimensions 1 to 3 is low as it arises near the zero-point (and none existent on dimension 2).

Square correlation ratio (R<sup>2</sup>) of the main variables contributing to the dimensions of the modified MCA for organ involvement and study centre Belgrade vs. the remaining centres:

## Phenotypes in sarcoidosis

| <u>Dimension 1</u> | <u>R2</u> | <u>p value</u> |
|--------------------|-----------|----------------|
| Muscle/Joint       | 0.55      | 0.00e+00       |
| Arthritis          | 0.53      | 7.22e-315      |
| Belgrade           | 0.34      | 1.48e-174      |

| <u>Dimension 3</u> | <u>R2</u> | <u>p value</u> |
|--------------------|-----------|----------------|
| Eye                | 0.41      | 6.55e-216      |
| CNS                | 0.31      | 2.48e-155      |
| Belgrade           | 0.16      | 1.59e-71       |

**Figure S2. Modified MCA including disease duration as variable**

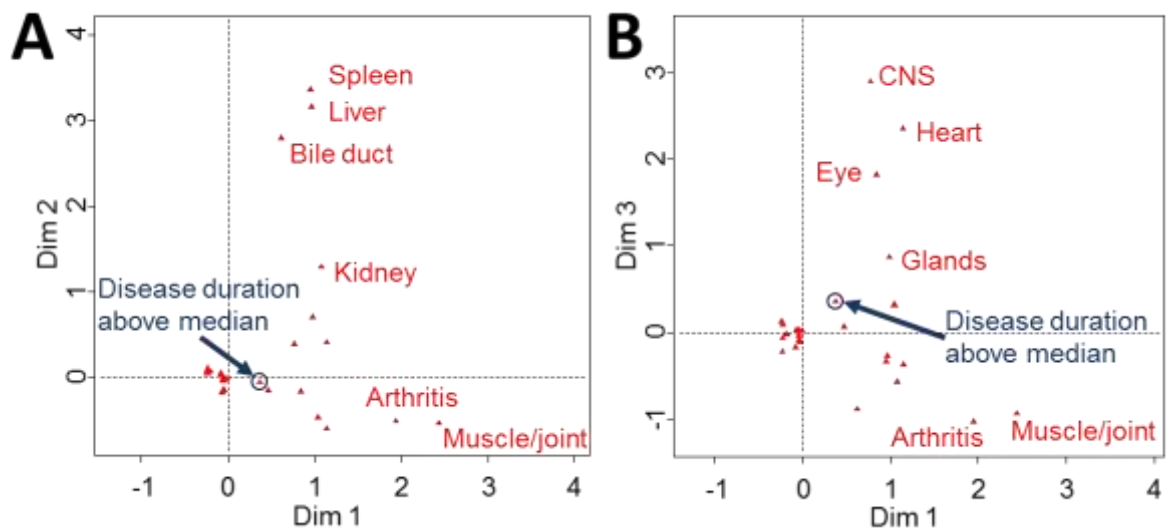

**Figure S2:** Factor maps of a modified MCA of organ involvement with inclusion of all original variables of organ involvement (as in figure 2) and additionally disease duration above the median of 12 months. We calculated this modified MCA to evaluate a potential bias of disease duration. Dichotomization of the variable “disease duration” was necessary to

achieve binary data as input for the modified MCA. A and B are scatter plots of variables contributing to different dimensions (MCA factor maps). Labelling of variables close to the zero-point was omitted due to narrowness. Factor loading of disease duration on dimensions 1 to 3 is low as it arises near the zero-point (and none existent on dimension 2).

Square correlation ratio (R<sup>2</sup>) of the main variables contributing to the dimensions of the modified MCA for organ involvement and disease duration:

| <u>Dimension 1</u>                | <u>R<sup>2</sup></u> | <u>p value</u> |       |
|-----------------------------------|----------------------|----------------|-------|
| Muscle/joint                      | 0.583                | 0.00E+00       |       |
| Arthritis                         | 0.495                | 5.24E-288      | [...] |
| Disease duration above the median | 0.098                | 3.47E-44       |       |
|                                   |                      |                |       |
| <u>Dimension 3</u>                | <u>R<sup>2</sup></u> | <u>p value</u> |       |
| CNS                               | 0.338                | 7.12E-174      |       |
| Eye                               | 0.326                | 1.17E-166      | [...] |
| Disease duration above the median | 0.088                | 1.74E-39       |       |

Dimension 2 is omitted as “disease duration” has no influence on dimension 2.

**Table S1. Recruiting centres**

| <b>Recruiting consortium members</b>                                                               | <b>Affiliation</b>                                                                           | <b>Number of included patients</b> |
|----------------------------------------------------------------------------------------------------|----------------------------------------------------------------------------------------------|------------------------------------|
| Prof. Dr. V. Mihailović-Vučinić<br>Prof. Dr. D. Jovanovic<br>S. Filipovic<br>J. Videnovic-Ivanovic | University Hospital, Belgrade, Serbia                                                        | 916                                |
| Prof. Dr. J. Müller-Quernheim                                                                      | Departement of Pneumology, University Medical Center, Killianstr. 5, 79106 Freiburg, Germany | 176                                |

# Phenotypes in sarcoidosis

|                                                                            |                                                                                                                                                                                                                                               |     |
|----------------------------------------------------------------------------|-----------------------------------------------------------------------------------------------------------------------------------------------------------------------------------------------------------------------------------------------|-----|
| Dr. J. Schupp<br>Prof. Dr. A. Prasse<br>Dr. A. Grubanovic<br>Dr. A. Müller |                                                                                                                                                                                                                                               |     |
| Prof. Dr. P. Rottoli<br><br>E. Bargagli<br><br>C. Oliveri                  | University Hospital, Siena, Italy                                                                                                                                                                                                             | 156 |
| Priv.-Doz. Dr. S. Pabst                                                    | University Hospital, Bonn, Germany                                                                                                                                                                                                            | 73  |
| Dr. P. Bresser<br>Dr. R. E. Jonkers                                        | Pulmonology Department, Academic Medical Center<br>Amsterdam, Meibergdreef 9, 1105 AZ Amsterdam, The<br>Netherlands                                                                                                                           | 70  |
| Prof. Dr. P. Zabel<br>Priv.-Doz. Dr. K.I. Gaede                            | Medical Hospital, Research Center Borstel, Parkallee 25, 23845<br>Borstel, Germany<br>Leibniz Center for Medicine and Biosciences, Airway Research<br>Center North, Member of the German Center for Lung Research<br>(DZL), Borstel, Germany. | 62  |
| Prof. A. Dubaniewicz                                                       | Department of Pulmonology, Medical University of Gdansk,<br>Poland                                                                                                                                                                            | 61  |
| Prof. Dr. B. Marshall<br>K. O'Reilly                                       | University Hospital, Southampton, UK                                                                                                                                                                                                          | 60  |
| Dr. R. Kieszko, MD PhD<br>Prof. Dr. J. Milanowski                          | Department of Pneumology, Oncology and Allergology,<br>Medical University of Lublin, Lublin, Poland                                                                                                                                           | 52  |
| Prof. Dr. A. Günther                                                       | University Hospital, Giessen, Germany                                                                                                                                                                                                         | 45  |
| Dr. A. Weihrich                                                            | Neuruppin, Germany                                                                                                                                                                                                                            | 40  |
| Prof. Dr. M. Petrek<br>V. Kolek                                            | Faculty of Medicine and Dentistry, Palacký University and<br>University Hospital Olomouc, Czech Republic                                                                                                                                      | 37  |
| Prof. Dr. M. P. Keane<br>Dr. S. O'Beirne<br>Prof. Dr. S. Donnelly          | University College Dublin and St Vincent's University Hospital,<br>Dublin, Ireland                                                                                                                                                            | 32  |
| Dr. S. Haraldsdottir<br>K. B. Jorundsdottir                                | University Hospital, Reykjavik, Iceland                                                                                                                                                                                                       | 32  |
| Prof. Dr. U. Costabel<br>Dr. F. Bonella                                    | Ruhrlandklinik, Westdeutsches Lungenzentrum am<br>Universitätsklinikum Essen gGmbH, Universitätsklinik Essen,<br>Tüschener Weg 40, 45239 Essen, Germany                                                                                       | 30  |
| Prof. Dr. B. Wallaert                                                      | University Hospital, Lille, France                                                                                                                                                                                                            | 31  |
| Dr. C. Grah                                                                | Hospital Berlin-Havelhöhe, Germany                                                                                                                                                                                                            | 31  |
| Prof. Dr. T. Peroš-<br>Golubičić                                           | University Hospital Jordanovac, Zagreb, Croatia                                                                                                                                                                                               | 29  |
| Prof. Dr. M. Luisetti<br>Dr. Z. Kadija                                     | Foundation IRCCS Policlinico San Matteo - Pulmonology Unit,<br>Pavia, Italy                                                                                                                                                                   | 28  |
| Prof. Dr. C. Grohé                                                         | Evangelische Lungenklinik, Lindenberger Weg 27, 13125 Berlin,<br>Germany                                                                                                                                                                      | 28  |
| Prof. Dr. J. Strausz                                                       | National Koranyi Institut, Pihenő út 1, Budapest 1122,, Hungary                                                                                                                                                                               | 25  |
| Prof. Dr. M. Vasakova<br>Assist. Prof. M. Stercova                         | Thomayer Hospital and 1 <sup>st</sup> Faculty of Medicine, Charles<br>University, Kateřinská 32, 121 08 Praha 2, Czech Republic                                                                                                               | 23  |
| Prof. Dr. A. Millar                                                        | University Hospital, Bristol, UK                                                                                                                                                                                                              | 23  |
| Prof. Dr. J. Homolka                                                       | Prague General Hospital, Charles University, Prague, Czech                                                                                                                                                                                    | 20  |

# Phenotypes in sarcoidosis

|                                                       |                                                                                                                                                                                                                             |    |
|-------------------------------------------------------|-----------------------------------------------------------------------------------------------------------------------------------------------------------------------------------------------------------------------------|----|
| Assist. Prof. A. Slovák                               | Republic                                                                                                                                                                                                                    |    |
| Prof. Dr. L. Ho,<br>Dr Y. Kendrick,<br>Dr A. Crawshaw | Oxford Sarcoidosis Servic, Oxford University Hospitals NHS Foundation Trust, Churchill Hospital, Old Rd, Headington, Oxford OX3 7LE, United Kingdom                                                                         | 20 |
| Prof. Dr. W. Wuyts                                    | University Hospital, Leuven, Belgium                                                                                                                                                                                        | 18 |
| Dr. L. Spencer                                        | Aintree University Hospital, Liverpool, UK                                                                                                                                                                                  | 14 |
| Prof. Dr. M. Peifer                                   | University Hospital, Regensburg, Germany                                                                                                                                                                                    | 9  |
| Prof. Dr. D. Valleyre                                 | Groupe Hospitalier Avicenne-Jean Verdier-René Muret, Service de Pneumologie, 125, rue de Stalingrad, 93017 Bobigny, Franc                                                                                                   | 9  |
| Prof. Dr. V. Poletti                                  | Pulmonary Unit, Department of Thoracic Diseases, Azienda USL Romagna, GB Morgagni-L-Pierantoni Hospital, Via Carlo Forlanini, 34 - Pavilion Morgagni, Forlì, Italy                                                          | 8  |
| Prof. Dr. H. Wirtz                                    | University Hospital, Department of Pneumology, Liebigstraße 20, 04103 Leipzig, Germany                                                                                                                                      | 5  |
|                                                       |                                                                                                                                                                                                                             |    |
| <b>Present affiliations</b>                           |                                                                                                                                                                                                                             |    |
| Priv.-Doz. Dr. S. Pabst                               | Pneumologische Gemeinschaftspraxis, Am Burgweiher 54, 53123 Bonn, Germany                                                                                                                                                   |    |
| Dr. K. O'Reilly                                       | Consultant Respiratory and Acute Medicine Physician, Assistant Professor of Medicine, University College Dublin, Department of Respiratory Medicine, Mater Misericordiae University Hospital, Eccles St., Dublin 7, Ireland |    |
| Prof. Dr. J. Strausz                                  | County Hospital, Törökbálint, Munkácsy Mihály 70, Törökbálint H-2045, Hungary                                                                                                                                               |    |

**Table S2. Gender differences**

|                                                              | <b>Male<br/>n=873</b>           | <b>Female<br/>n=1290</b>        | <b>p values</b>      |
|--------------------------------------------------------------|---------------------------------|---------------------------------|----------------------|
| <b>Age [years]</b>                                           | 44.0 ± 11.5                     | 49.5 ± 12.1                     | < 1*10 <sup>-6</sup> |
| <b>Body height [cm]</b>                                      | 177.5 ± 7.1                     | 163.2 ± 7.0                     | < 1*10 <sup>-6</sup> |
| <b>Body weight [kg]</b>                                      | 86.2 ± 14.5                     | 73.1 ± 15.1                     | < 1*10 <sup>-6</sup> |
| <b>Smoking history [never / previously / currently in %]</b> | 63.4 / 25.4 / 11.1              | 76.5 / 14.3 / 9.2               | < 1*10 <sup>-6</sup> |
| <b>Packyears of cigarettes</b>                               | 7.7 ± 10.8                      | 5.4 ± 9.4                       | < 0.01               |
| <b>Chest X-ray type [0 / I / II / III / IV in %]</b>         | 12.6 / 33.8 / 39.7 / 10.7 / 3.3 | 18.9 / 37.6 / 28.6 / 10.6 / 4.3 | < 1*10 <sup>-6</sup> |
| <b>TLC [% predicted]</b>                                     | 92.2 ± 15.1                     | 101.3 ± 16.5                    | < 1*10 <sup>-6</sup> |
| <b>FEV1 [% predicted]</b>                                    | 89.6 ± 21.1                     | 94.9 ± 19.7                     | < 1*10 <sup>-6</sup> |

|                                         |      |      |                      |
|-----------------------------------------|------|------|----------------------|
| <b>Lung involvement [%]</b>             | 91.9 | 93.1 | n.s., 0.4            |
| <b>Bronchial involvement [%]</b>        | 67.8 | 72.7 | n.s., 0.7            |
| <b>Intrathoracic lymph nodes [%]</b>    | 81.4 | 74.0 | < 0.001              |
| <b>Extrathoracic lymph nodes [%]</b>    | 12.1 | 10.9 | n.s., 0.56           |
| <b>Skin involvement [%]</b>             | 11.9 | 18.9 | < 1*10 <sup>-4</sup> |
| <b>Eye involvement [%]</b>              | 5.6  | 9.2  | < 0.01               |
| <b>CNS involvement [%]</b>              | 3.0  | 3.6  | n.s., 0.52           |
| <b>Gland involvement [%]</b>            | 2.6  | 4.7  | < 0.05               |
| <b>Cardiac involvement [%]</b>          | 3.2  | 3.2  | n.s., 1              |
| <b>Hepatic involvement [%]</b>          | 5.9  | 4.3  | n.s., 0.11           |
| <b>Splenic involvement [%]</b>          | 4.3  | 3.6  | n.s., 0.46           |
| <b>Renal involvement [%]</b>            | 3.8  | 2.9  | n.s., 0.28           |
| <b>Musculoskeletal involvement [%]</b>  | 6.7  | 8.1  | n.s., 0.29           |
| <b>Gastrointestinal involvement [%]</b> | 0.4  | 0.8  | n.s., 0.34           |
| <b>Genital involvement [%]</b>          | 0.1  | 0.2  | n.s., 0.93           |
| <b>Arthritis [%]</b>                    | 9.9  | 9.4  | n.s., 0.79           |
| <b>Need for therapie [%]</b>            | 60.3 | 61.9 | n.s., 0.47           |
| <b>Fatigue [%]</b>                      | 55.0 | 66.4 | < 1*10 <sup>-4</sup> |
| <b>Fever [%]</b>                        | 23.0 | 18.5 | < 0.05               |
| <b>Night sweat [%]</b>                  | 12.6 | 13.1 | n.s., 0.84           |
| <b>Weight loss [%]</b>                  | 10.5 | 9.1  | n.s., 0.37           |
| <b>Arthralgia [%]</b>                   | 41.5 | 54.7 | < 1*10 <sup>-6</sup> |
| <b>Cough [%]</b>                        | 49.1 | 47.0 | n.s., 0.41           |
| <b>Dyspnoea [%]</b>                     | 43.0 | 45.3 | n.s., 0.35           |
| <b>Chest pain [%]</b>                   | 18.6 | 23.4 | < 0.05               |
| <b>Haemoptoea [%]</b>                   | 1.1  | 1.7  | n.s., 0.43           |

**Table S2:** Data are presented as mean  $\pm$  SD or percentages. TLC = total lung capacity; FEV1 = forced expiratory volume in 1 second; CNS = central nervous system.

**Table S3. Age differences**

|                            | <b>Age <math>\leq</math> 40 years<br/>n=712</b> | <b>Age &gt; 40 years<br/>n=1445</b> | <b>p values</b>      |
|----------------------------|-------------------------------------------------|-------------------------------------|----------------------|
| <b>Sex [male / female]</b> | 53.4/ 46.6                                      | 34.0 / 66.0                         | < 1*10 <sup>-6</sup> |

|                                                              |                                |                                 |                      |
|--------------------------------------------------------------|--------------------------------|---------------------------------|----------------------|
| <b>Body height [cm]</b>                                      | 173.3 ± 9.6                    | 166.9 ± 9.4                     | < 1*10 <sup>-6</sup> |
| <b>Body weight [kg]</b>                                      | 79.3 ± 17.8                    | 78.0 ± 15.3                     | n.s., 0.14           |
| <b>Smoking history [never / previously / currently in %]</b> | 61.9 / 22.1 / 15.9             | 75.8 / 17.2 / 6.9               | < 1*10 <sup>-6</sup> |
| <b>Packyears of cigarettes</b>                               | 5.7 ± 7.5                      | 8.7 ± 12.2                      | n.s., 0.45           |
| <b>Chest X-ray type [0 / I / II / III / IV in %]</b>         | 12.7 / 45.8 / 32.4 / 5.8 / 3.5 | 18.3 / 31.5 / 33.1 / 13.0 / 4.2 | < 1*10 <sup>-6</sup> |
| <b>TLC [% predicted]</b>                                     | 96.6 ± 15.9                    | 98.4 ± 16.8                     | n.s., 0.05           |
| <b>FEV1 [% predicted]</b>                                    | 92.1 ± 20.1                    | 93.2 ± 20.6                     | n.s., 0.24           |
| <b>Lung involvement [%]</b>                                  | 92.8                           | 92.5                            | n.s., 0.88           |
| <b>Bronchial involvement [%]</b>                             | 78.2                           | 66.4                            | < 1*10 <sup>-4</sup> |
| <b>Intrathoracic lymph nodes [%]</b>                         | 85.0                           | 72.7                            | < 1*10 <sup>-6</sup> |
| <b>Extrathoracic lymph nodes [%]</b>                         | 12.6                           | 10.5                            | n.s., 0.29           |
| <b>Skin involvement [%]</b>                                  | 15.3                           | 16.5                            | n.s., 0.53           |
| <b>Eye involvement [%]</b>                                   | 5.5                            | 8.9                             | < 0.05               |
| <b>CNS involvement [%]</b>                                   | 3.9                            | 3.2                             | n.s., 0.46           |
| <b>Gland involvement [%]</b>                                 | 3.4                            | 4.0                             | n.s., 0.57           |
| <b>Cardiac involvement [%]</b>                               | 1.9                            | 3.9                             | < 0.05               |
| <b>Hepatic involvement [%]</b>                               | 4.9                            | 4.9                             | n.s., 1              |
| <b>Splenic involvement [%]</b>                               | 3.7                            | 4.0                             | n.s., 0.88           |
| <b>Renal involvement [%]</b>                                 | 2.7                            | 3.6                             | n.s., 0.36           |
| <b>Musculoskeletal involvement [%]</b>                       | 8.1                            | 7.2                             | n.s., 0.50           |
| <b>Gastrointestinal involvement [%]</b>                      | 0.6                            | 0.7                             | n.s., 1              |
| <b>Genital involvement [%]</b>                               | 0.2                            | 0.2                             | n.s., 1              |
| <b>Arthritis [%]</b>                                         | 11.3                           | 8.7                             | n.s., 0.08           |
| <b>Need for therapie [%]</b>                                 | 60.9                           | 61.4                            | n.s., 0.87           |
| <b>Fatigue [%]</b>                                           | 63.3                           | 61.0                            | n.s., 0.38           |
| <b>Fever [%]</b>                                             | 29.7                           | 15.4                            | < 1*10 <sup>-6</sup> |
| <b>Night sweat [%]</b>                                       | 11.4                           | 13.6                            | n.s., 0.23           |
| <b>Weight loss [%]</b>                                       | 10.4                           | 9.3                             | n.s., 0.54           |
| <b>Arthralgia [%]</b>                                        | 50.4                           | 49.0                            | n.s., 0.61           |
| <b>Cough [%]</b>                                             | 49.3                           | 47.1                            | n.s., 0.42           |
| <b>Dyspnoea [%]</b>                                          | 37.7                           | 47.5                            | < 1*10 <sup>-4</sup> |
| <b>Chest pain [%]</b>                                        | 23.3                           | 20.4                            | n.s., 0.18           |
| <b>Haemoptoea [%]</b>                                        | 1.6                            | 1.3                             | n.s., 0.70           |

**Table S3:** Data are presented as mean ± SD or percentages. TLC = total lung capacity; FEV1 = forced expiratory volume in 1 second; CNS = central nervous system.

**Table S4. Patients' characteristics – symptoms and comorbidities**

|                                                     | All patients | sarcoid | Acute onset<br>n=829 | Subacute onset<br>n=1286 | p values      |
|-----------------------------------------------------|--------------|---------|----------------------|--------------------------|---------------|
| <b>Fatigue [%]</b>                                  | 61.8         |         | 67.6                 | 57.9                     | $< 1*10^{-4}$ |
| <b>Fever [%]</b>                                    | 20.3         |         | 32.6                 | 10.9                     | $< 1*10^{-6}$ |
| <b>Night sweat [%]</b>                              | 12.9         |         | 15.3                 | 11.1                     | $< 0.05$      |
| <b>Weight loss [%]</b>                              | 9.7          |         | 9.7                  | 9.8                      | n.s., 1       |
| <b>Arthralgia [%]</b>                               | 49.5         |         | 63.7                 | 38.6                     | $< 1*10^{-6}$ |
| <b>Cough [%]</b>                                    | 47.9         |         | 44.9                 | 49.9                     | $< 0.05$      |
| <b>Dyspnoea [%]</b>                                 | 44.4         |         | 35.9                 | 50.1                     | $< 1*10^{-6}$ |
| <b>Chest pain [%]</b>                               | 21.5         |         | 21.6                 | 21.4                     | n.s., 0.95    |
| <b>Haemoptoea [%]</b>                               | 1.5          |         | 1.3                  | 1.6                      | n.s., 0.69    |
| <b>Familial sarcoidosis [%]</b>                     | 3.1          |         | 2.6                  | 3.4                      | n.s., 0.38    |
| <b>Hemoglobin [g/dl]</b>                            | 12.3 ± 4.1   |         | 12.5 ± 3.5           | 12.3 ± 4.4               | $< 0.001$     |
| <b>Leukocytes [<math>10^6/\mu\text{l}</math>]</b>   | 6.6 ± 3.0    |         | 7.0 ± 2.7            | 6.4 ± 3.2                | $< 1*10^{-4}$ |
| <b>Thrombocytes [<math>10^6/\mu\text{l}</math>]</b> | 264 ± 76     |         | 278 ± 87             | 258 ± 71                 | $< 0.01$      |
| <b>History of:</b>                                  |              |         |                      |                          |               |
| <b>Oncologic disease [%]</b>                        | 4.8          |         | 3.8                  | 5.3                      | n.s., 0.13    |
| <b>Rheumatic disease [%]</b>                        | 2.5          |         | 2.6                  | 2.5                      | n.s., 1       |
| <b>Ulcerative colitis [%]</b>                       | 0.5          |         | 0.5                  | 0.5                      | n.s., 1       |
| <b>Crohn's disease [%]</b>                          | 0.6          |         | 0.7                  | 0.5                      | n.s., 0.65    |
| <b>Cardiovascular disease [%]</b>                   | 23.4         |         | 21.1                 | 24.5                     | n.s., 0.08    |

**Table S4:** Data are presented as mean ± SD or percentages. #Significance levels comparing acute vs. subacute onset.

**Table S5. Basic characteristics of patients not included in MCA due to missing values**

|                    | Included patients<br>n=1932 | Not included patients<br>n=231 | p values |
|--------------------|-----------------------------|--------------------------------|----------|
| <b>Age [years]</b> | 46.7 ± 12.1                 | 49.5 ± 11.7                    | $< 0.01$ |



|                                                              |                    |                   |                      |
|--------------------------------------------------------------|--------------------|-------------------|----------------------|
| <b>Sex [male / female]</b>                                   | 41.3 / 58.7        | 32.5 / 67.5       | < 0.05               |
| <b>Body height [cm]</b>                                      | 169.2 ± 10.0       | 166.7 ± 9.4       | < 0.001              |
| <b>Body weight [kg]</b>                                      | 78.5 ± 16.3        | 77.4 ± 14.7       | n.s., 0.4            |
| <b>Smoking history [never / previously / currently in %]</b> | 70.2 / 19.6 / 10.1 | 79.6 / 11.7 / 8.7 | < 0.001              |
| <b>TLC [% predicted]</b>                                     | 97.0 ± 16.7        | 103.9 ± 14.4      | < 1*10 <sup>-6</sup> |
| <b>FEV1 [% predicted]</b>                                    | 91.9 ± 20.4        | 100.6 ± 19.1      | < 1*10 <sup>-6</sup> |

**Table S5:** Data are presented as mean ± SD or percentages. TLC = total lung capacity; FEV1 = forced expiratory volume in 1 second.

**Table S6. MCA Organ involvement**

| <b>Dimension 1</b>          | <b>R2</b> | <b>p value</b> |
|-----------------------------|-----------|----------------|
| Musculoskeletal involvement | 0.6196    | 0.00E+00       |
| Arthritis                   | 0.5409    | 0.00E+00       |
| Skin involvement            | 0.2487    | 7.11E-121      |

  

| <b>Dimension 2</b>    | <b>R2</b> | <b>p value</b> |
|-----------------------|-----------|----------------|
| Liver involvement     | 0.5884    | 0.00E+00       |
| Spleen involvement    | 0.5195    | 0.00E+00       |
| Bile duct involvement | 0.0818    | 1.44E-36       |
| Kidney involvement    | 0.0639    | 1.88E-28       |

  

| <b>Dimension 3</b>  | <b>R2</b> | <b>p value</b> |
|---------------------|-----------|----------------|
| Eye involvement     | 0.4131    | 1.15E-224      |
| CNS involvement     | 0.3544    | 1.35E-184      |
| Cardiac involvement | 0.1760    | 4.35E-82       |
| Glands involvement  | 0.0849    | 5.35E-38       |

  

| <b>Dimension 4</b>    | <b>R2</b> | <b>p value</b> |
|-----------------------|-----------|----------------|
| Lung involvement      | 0.4231    | 7.37E-232      |
| Bronchial involvement | 0.1646    | 2.73E-76       |

**Table S6:** Square correlation ratio (R2) of the main variables contributing to the dimensions of the multiple correspondence analysis for organ involvement.

**Table S7. Musculoskeletal phenotype**

| <b>Arthritis</b> | <b>Musculoskeletal</b> |
|------------------|------------------------|
|------------------|------------------------|

|                                      |                       | involvement                 |
|--------------------------------------|-----------------------|-----------------------------|
| <b>Acute onset</b>                   | 63.1 % vs. 38.9 % *** | 59.3 % vs. 39.0 % ***       |
| <b>Lung involvement [%]</b>          | 84.3 % vs. 93.8 % *   | 87.8 % vs. 93.6 % *         |
| <b>Bronchial involvement [%]</b>     | 51.2 % vs. 72.7 % **  | 51.7 % vs. 72.0 % **        |
| <b>Intrathoracic lymph nodes [%]</b> | 90.0 % vs. 75.6 % *   | 90.3 % vs. 76.4 % *         |
| <b>Skin involvement [%]</b>          | 41.9 % vs. 12.8 % *** | 47.6 % vs. 13.4 % ***       |
| <b>Eye involvement [%]</b>           | 16.3 % and 7.3 % **   | 11.4 % vs. 7.1 %, p = 0.057 |
| <b>Renal involvement [%]</b>         | 6.7 % vs. 2.8 % *     | 7.0% vs. 2.6 % *            |
| <b>Fever / subfebrile [%]</b>        | 42.2 % vs. 18.8 % *** | 29.8 % vs. 19.9 % *         |
| <b>Night sweat [%]</b>               | 25.2 % vs. 11.2 % *** | 23.1 % vs. 11.5 % **        |
| <b>Weight loss [%]</b>               | 14.8 % vs. 8.1 % *    | 15.1 % vs. 8.8 % *          |
| <b>Arthralgia [%]</b>                | 90.7 % vs. 47.6 % *** | 89.4 % vs. 47.4 % ***       |

**Table S7.** Data are presented as percentages. All frequencies are given as with arthritis/musculoskeletal involvement vs. without arthritis/musculoskeletal involvement (for significance levels: \* p < 0.05, \*\* p < 0.001, \*\*\* p < 0.000001).

**Table S8. Pulmonary-lymphonodal and Extrapulmonary phenotype**

|                                        | Pulmonary involvement | No pulmonary involvement | p values             |
|----------------------------------------|-----------------------|--------------------------|----------------------|
| <b>TLC [% predicted]</b>               | 96.5 ± 16.4           | 105.1 ± 17.2             | < 1*10 <sup>-5</sup> |
| <b>FEV1 [% predicted]</b>              | 91.0 ± 19.9           | 98.4 ± 17.6              | < 1*10 <sup>-4</sup> |
| <b>Intrathoracic lymph nodes [%]</b>   | 89.7 %                | 80.2 %                   | < 0.05               |
| <b>Skin involvement [%]</b>            | 15.6 %                | 26.0 %                   | < 0.01               |
| <b>Musculoskeletal involvement [%]</b> | 6,9 %                 | 16.9 %                   | < 1*10 <sup>-4</sup> |
| <b>Arthritis [%]</b>                   | 8.8 %                 | 17.7 %                   | < 0.01               |
| <b>Fatigue [%]</b>                     | 69.4 %                | 37.8 %                   | < 1*10 <sup>-6</sup> |
| <b>Cough [%]</b>                       | 56.4 %                | 33.3 %                   | < 1*10 <sup>-4</sup> |
| <b>Dyspnoea [%]</b>                    | 51.8 %                | 33.3 %                   | < 0.01               |
| <b>Chest pain [%]</b>                  | 25.8 %                | 11.6 %                   | < 0.01               |

**Table S8:** Data are presented as mean ± SD or percentages. TLC = total lung capacity; FEV1 = forced expiratory volume in 1 second.

**Table S9. Basic characteristics of Serbians and non-Serbians**

|                                                              | <b>Serbians<br/>n=916</b> | <b>Non-Serbians<br/>n=1247</b> | <b>p values</b>      |
|--------------------------------------------------------------|---------------------------|--------------------------------|----------------------|
| <b>Age [years]</b>                                           | 46.2 ± 11.2               | 47.6 ± 12.7                    | n.s., 0.06           |
| <b>Sex [male / female]</b>                                   | 31.6 / 68.4               | 46.8 / 53.2                    | < 1*10 <sup>-6</sup> |
| <b>Body height [cm]</b>                                      | 167.4 ± 9.7               | 170.1 ± 9.9                    | < 1*10 <sup>-6</sup> |
| <b>Body weight [kg]</b>                                      | 78.0 ± 14.9               | 78.6 ± 17.1                    | n.s., 0.60           |
| <b>Smoking history [never / previously / currently in %]</b> | 77.3 / 10.2 / 12.6        | 66.7 / 25.2 / 8.1              | < 1*10 <sup>-6</sup> |

**Table S9:** Data are presented as mean ± SD or percentages.
